# Supplementary material
Source: PubMed Central journal article supplement (PMC5984671)
Supplement: NIHMS941551-supplement-Supp_FigS1-11.pdf [file NIHMS941551-supplement-Supp_FigS1-11.pdf]

Control

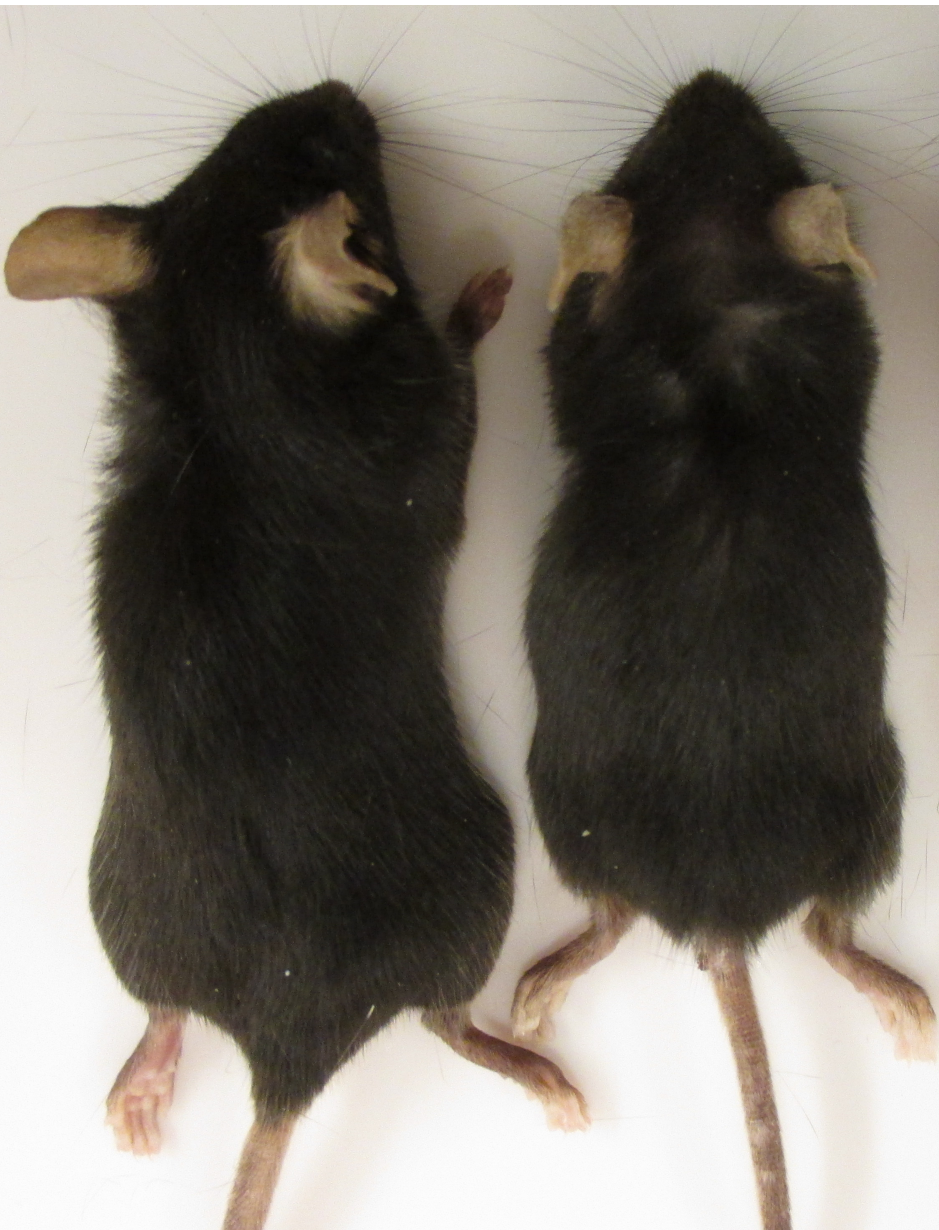

Score 1

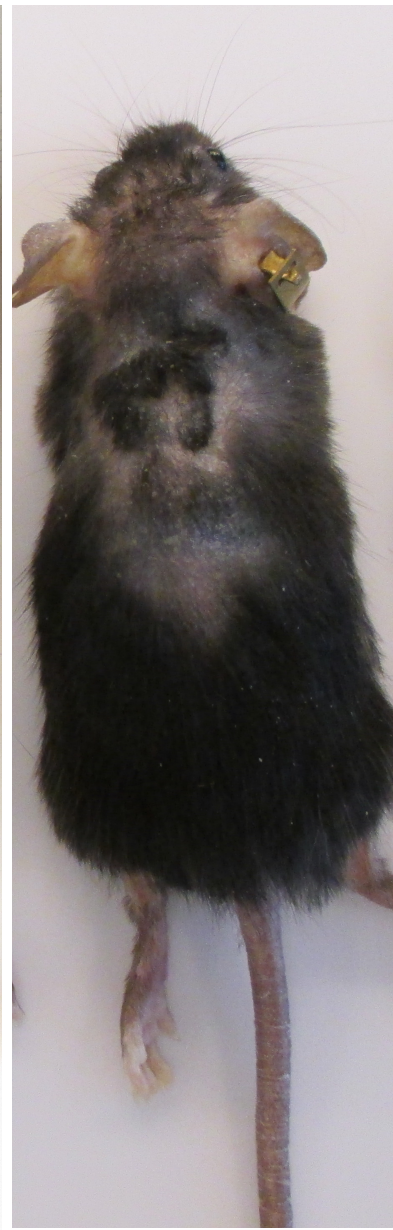

Score 2

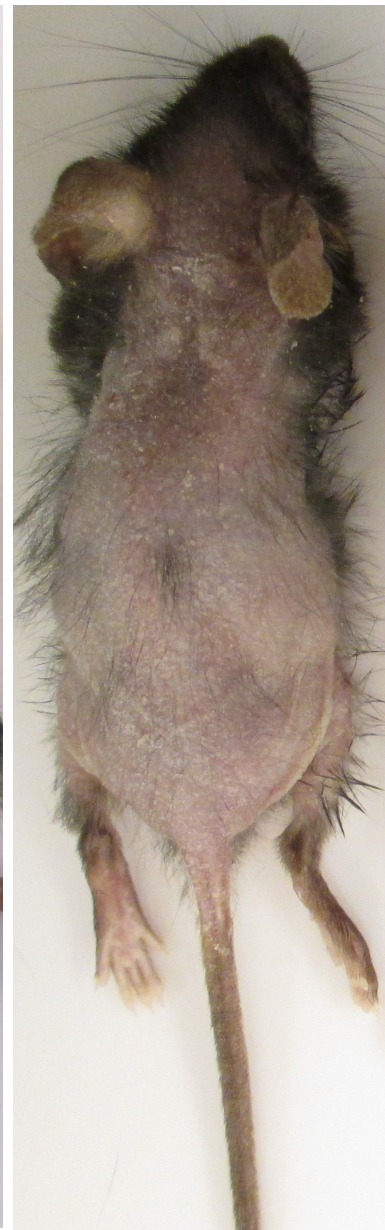

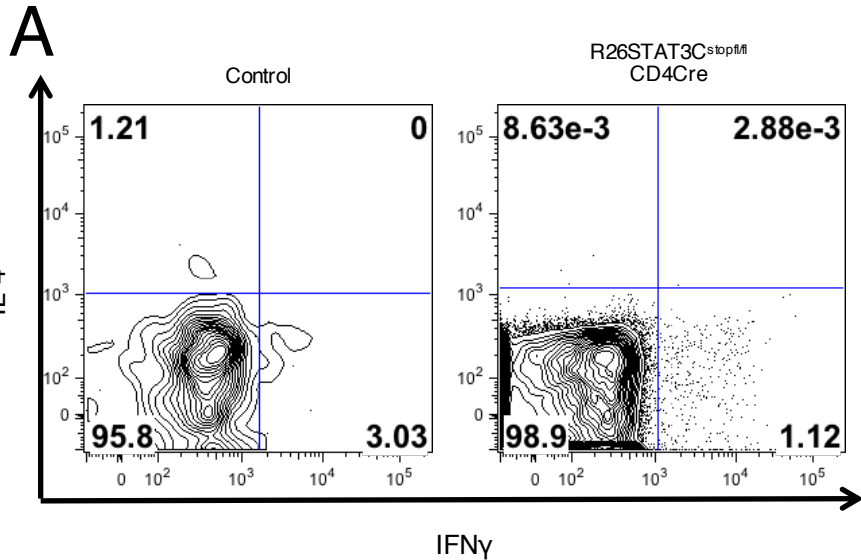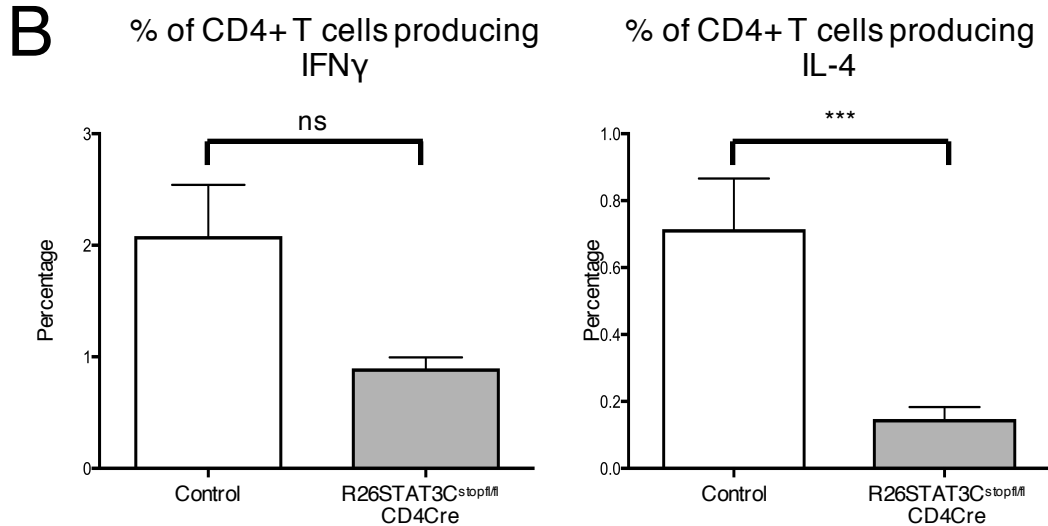

**A**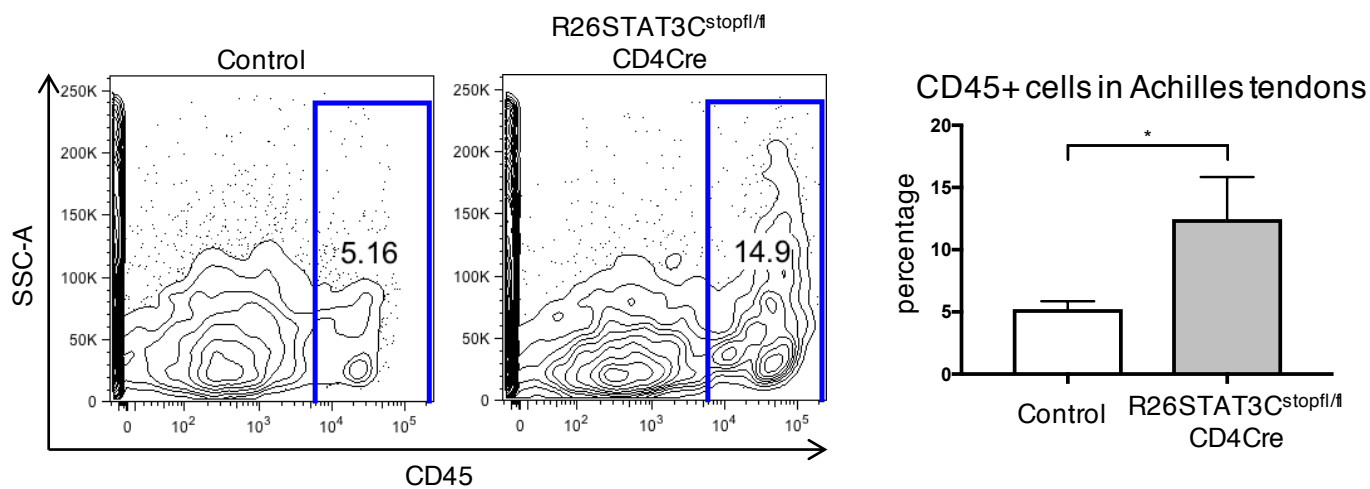**B**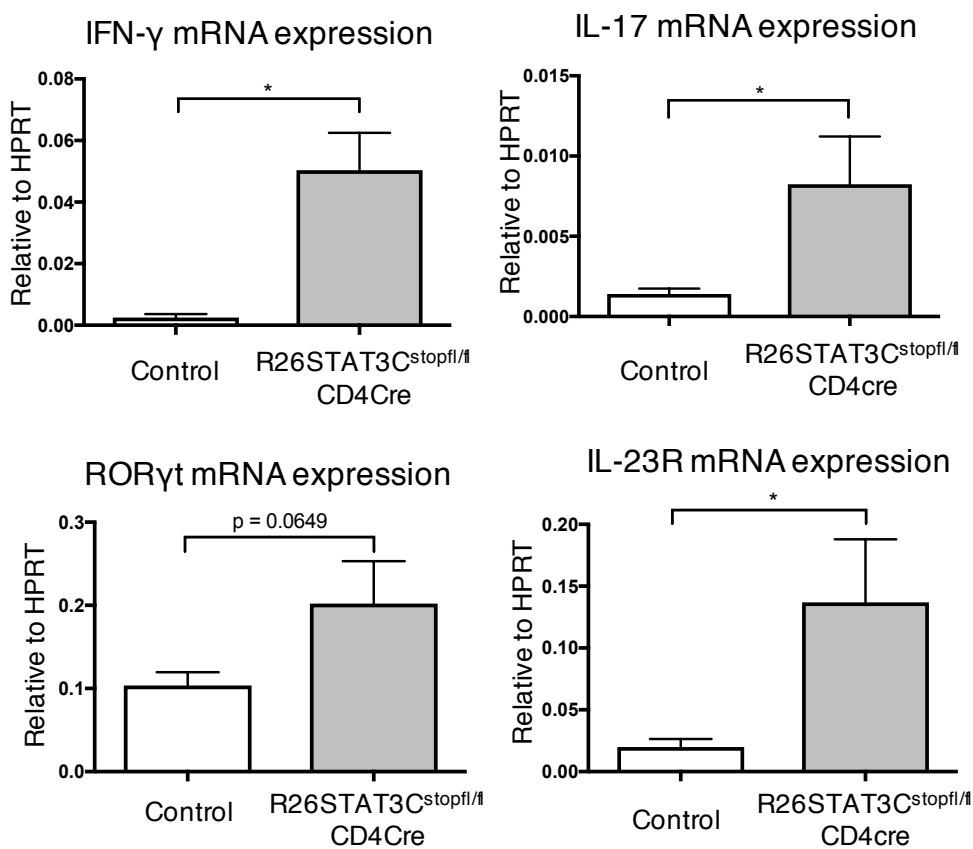**C**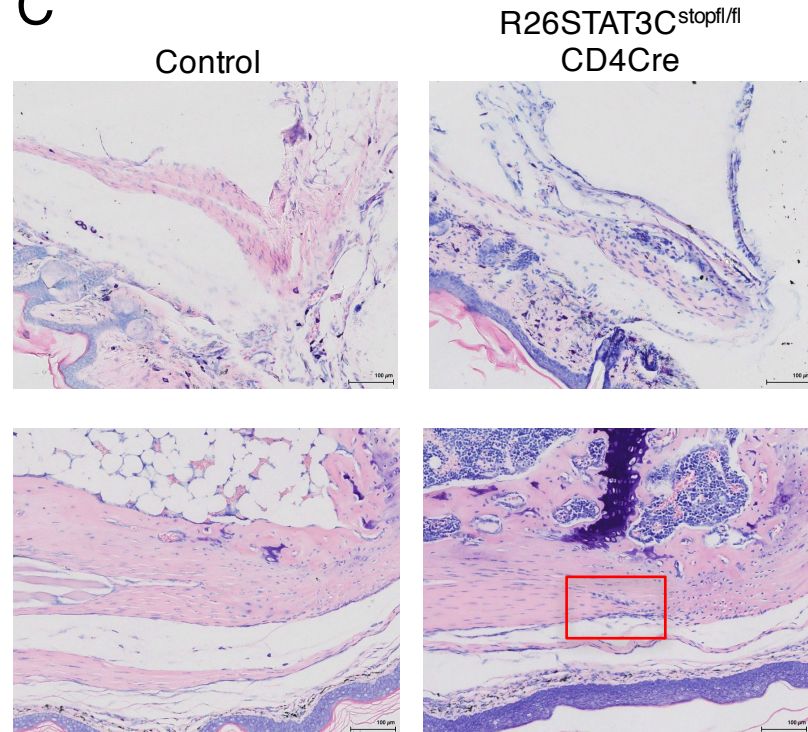

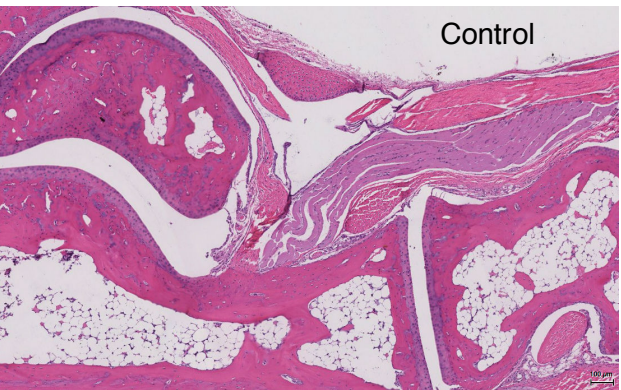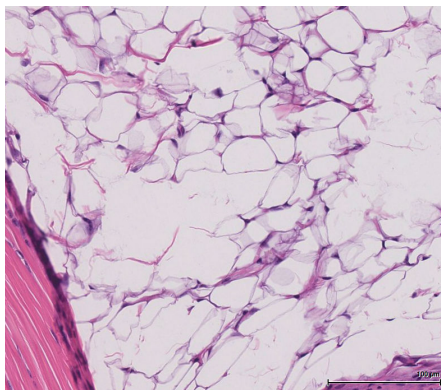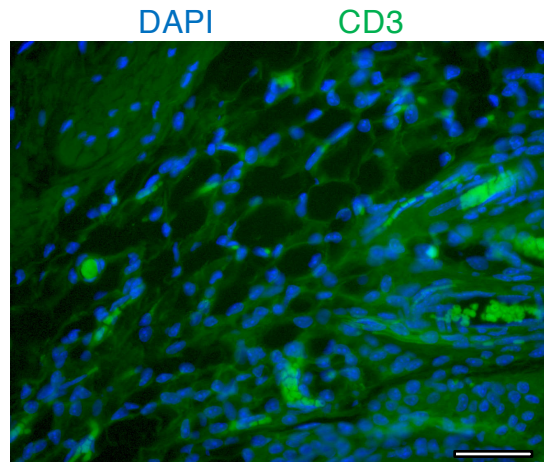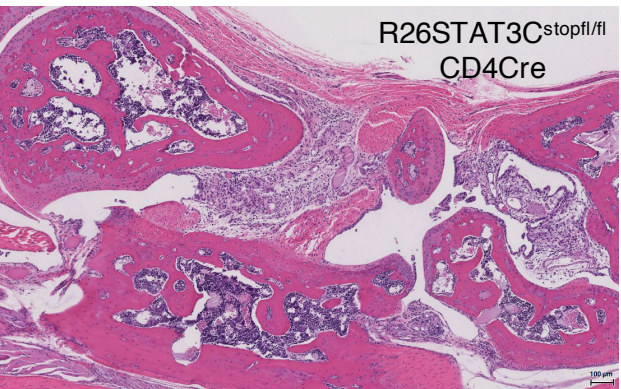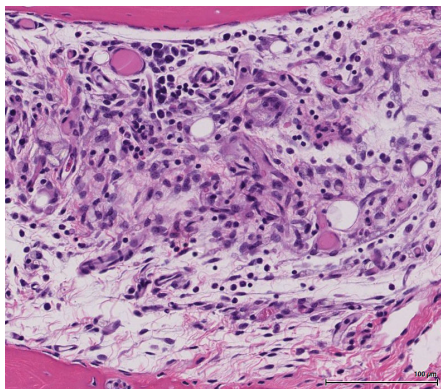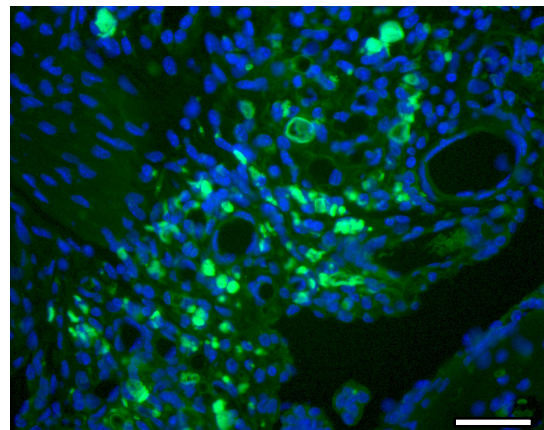

Control

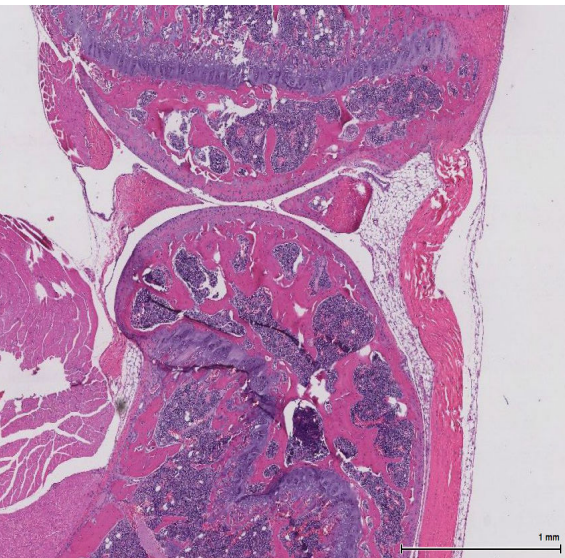

R26STAT3<sup>stopfl/fl</sup>  
CD4cre

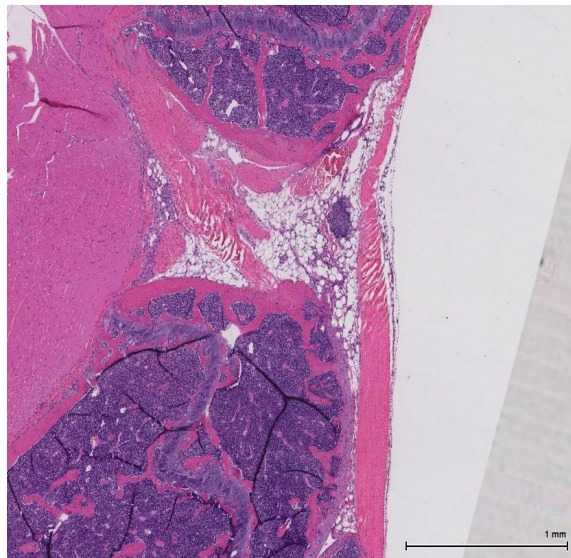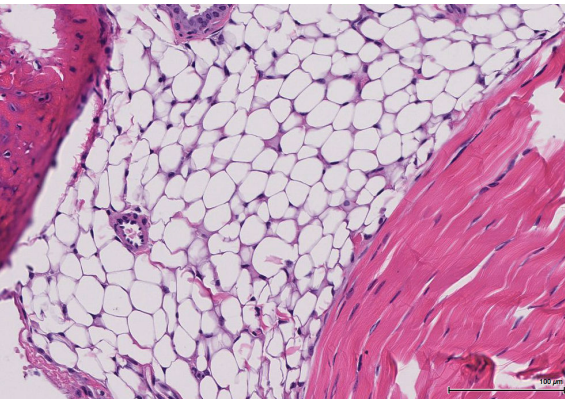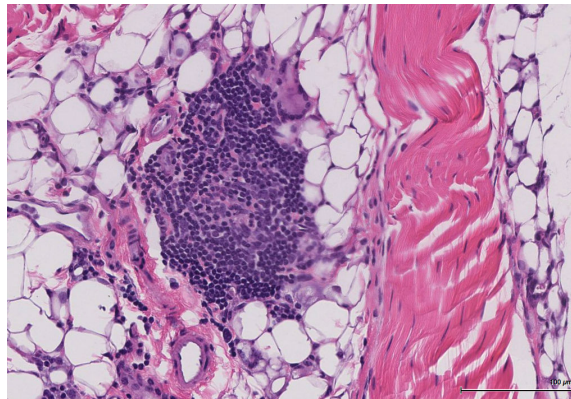

**A**

DEXA Scan

Control

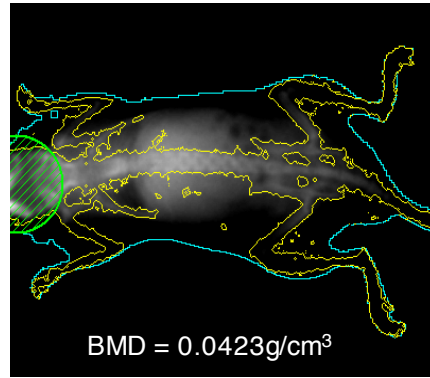R26STAT3<sup>stopfl/1</sup>  
CD4Cre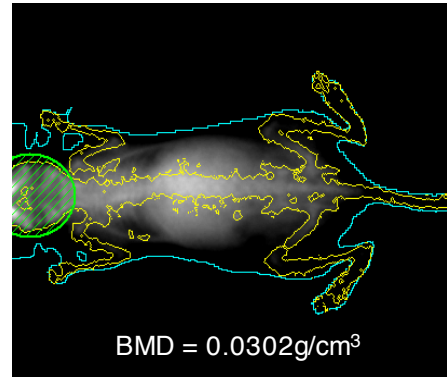**B**

Bright Field

Cathepsin K

DAPI

Merge

Control

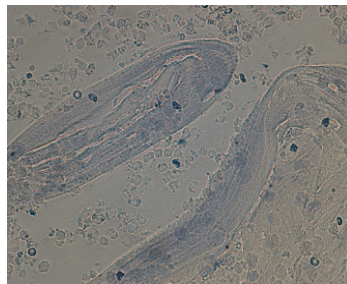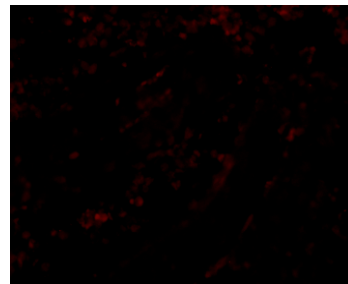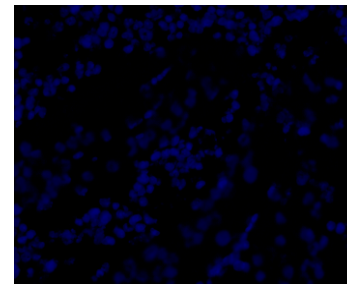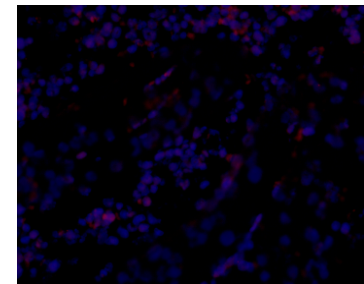R26STAT3<sup>stopfl/1</sup> CD4Cre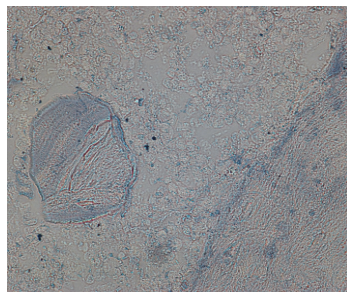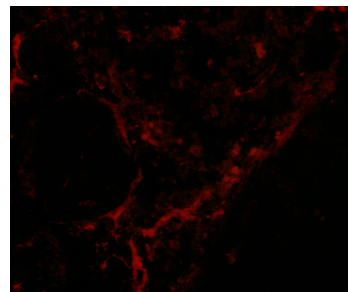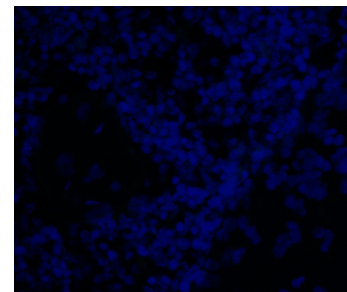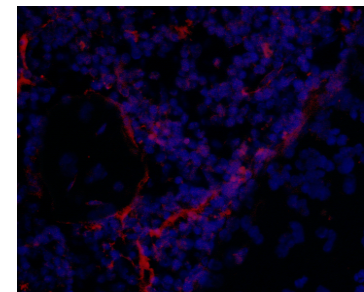

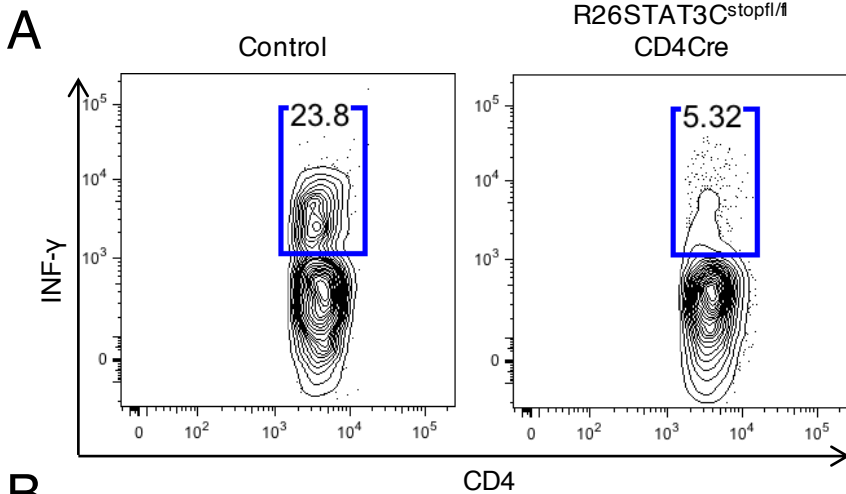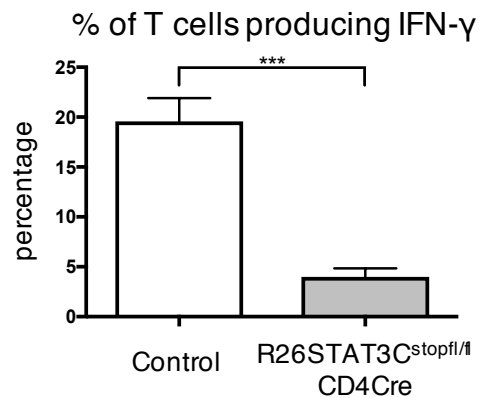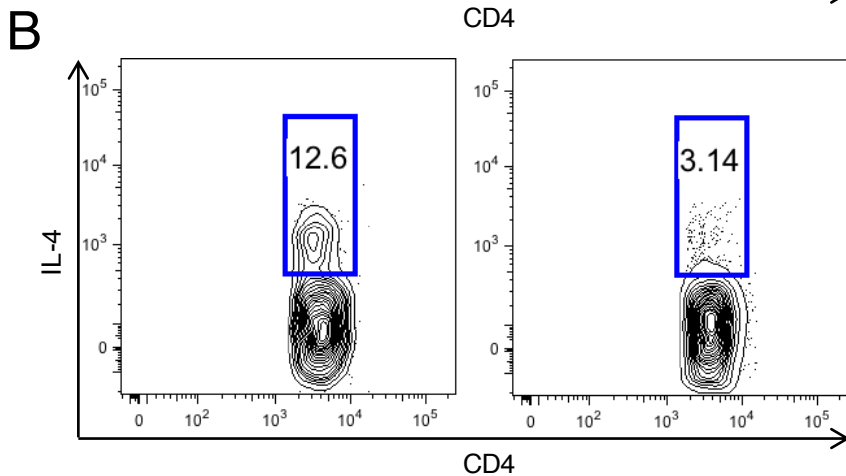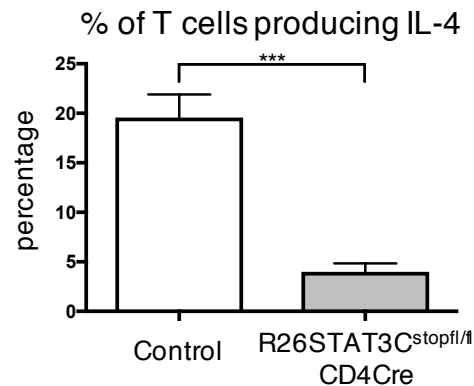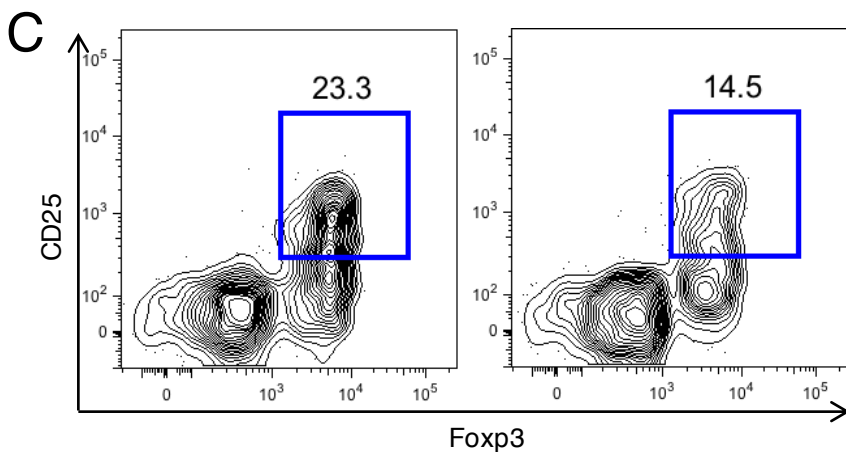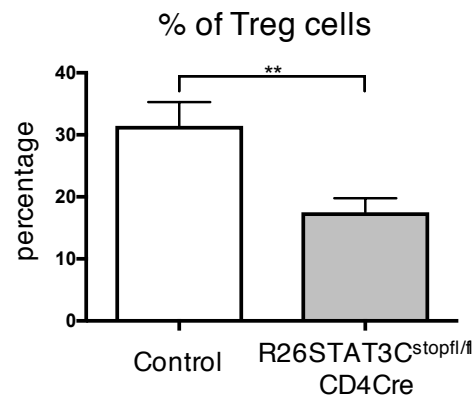

A

CD11b-Ly6C<sup>-</sup>, CD11b<sup>hi</sup> Ly6C<sup>mid</sup> +  
M-CSF & RANKL

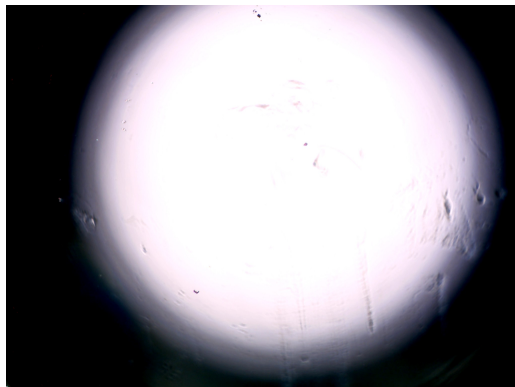

OCP + M-CSF & RANKL

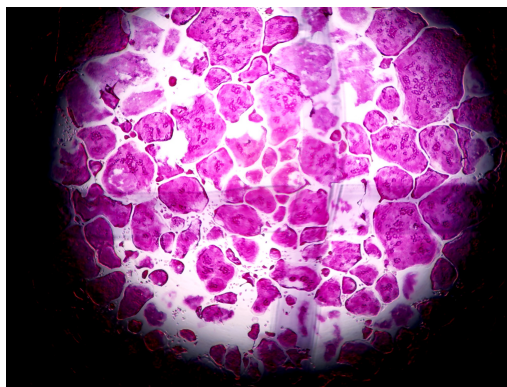

B

Control

R26STAT3<sup>stopfl/1</sup> CD4Cre

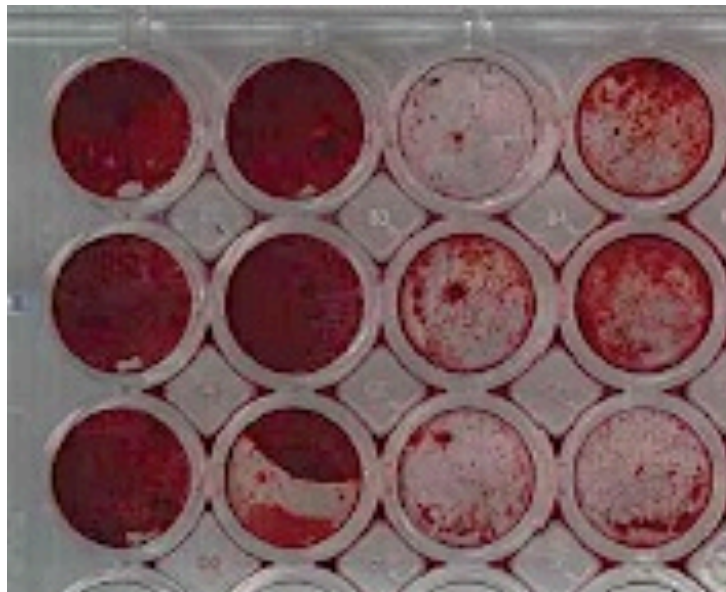

*In vitro* osteoblast differentiation

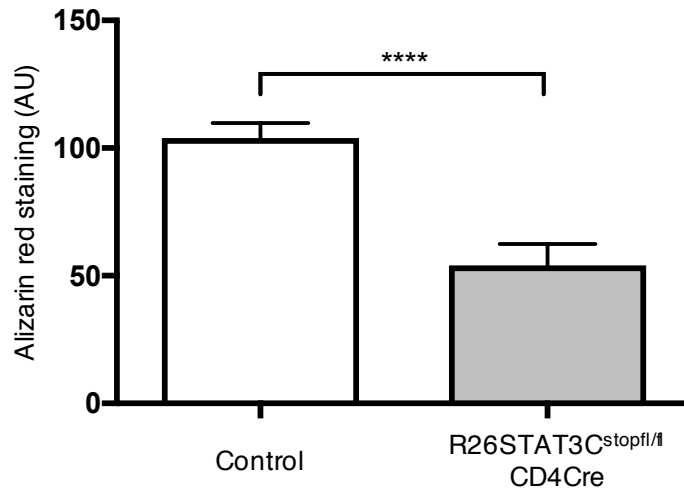



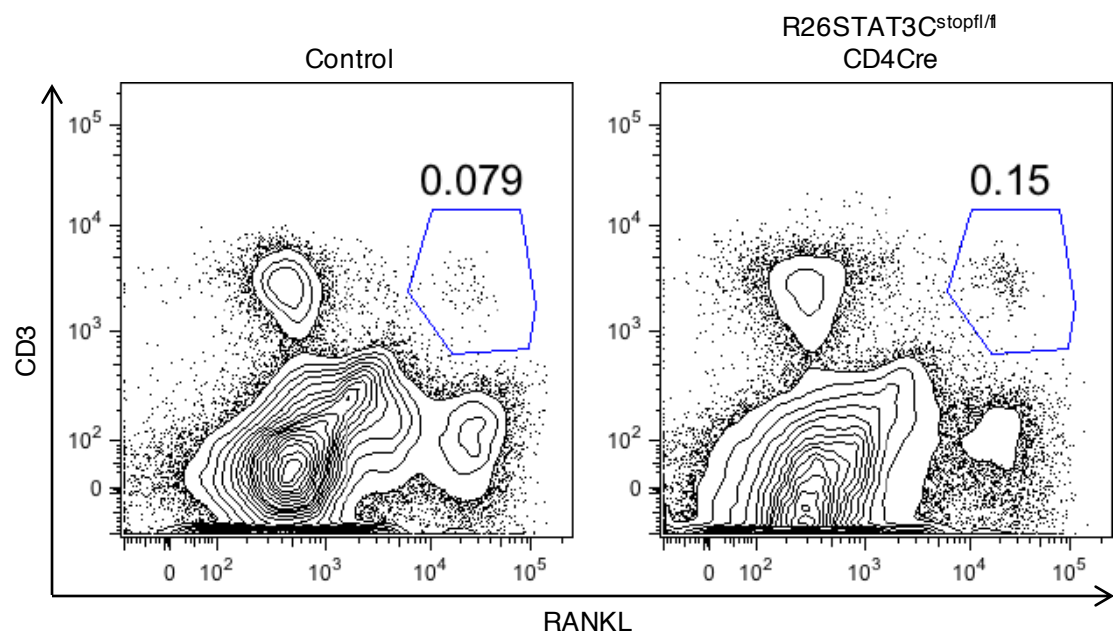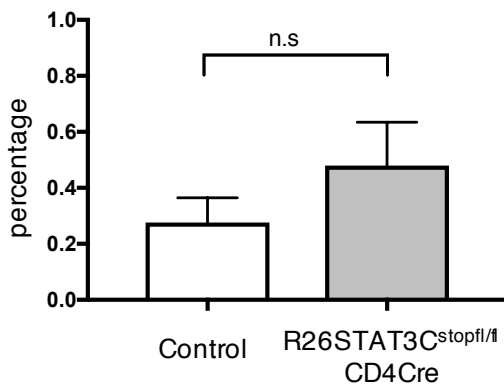

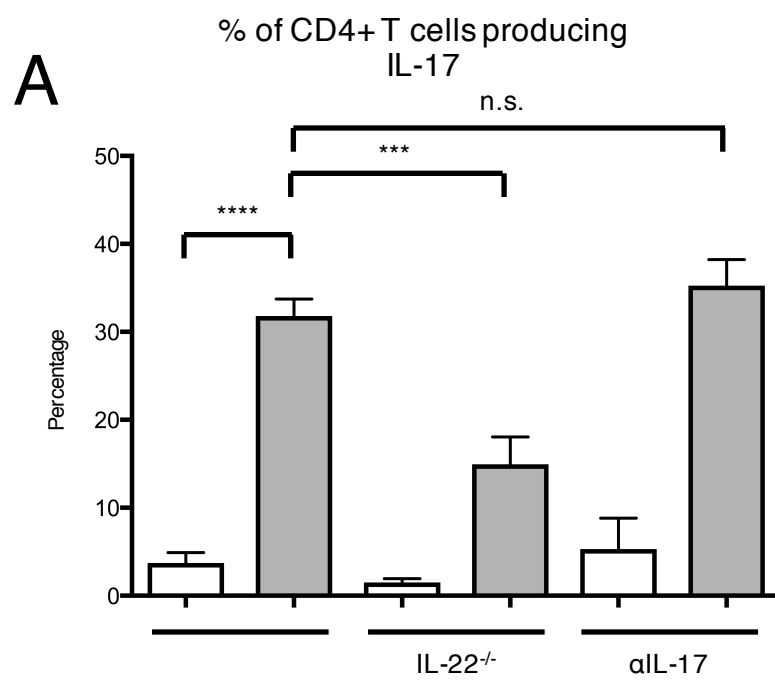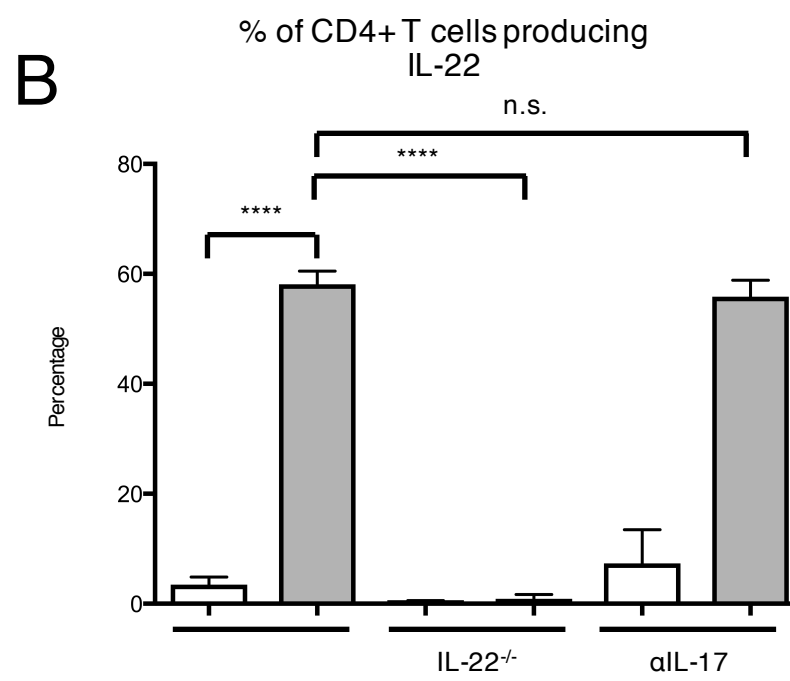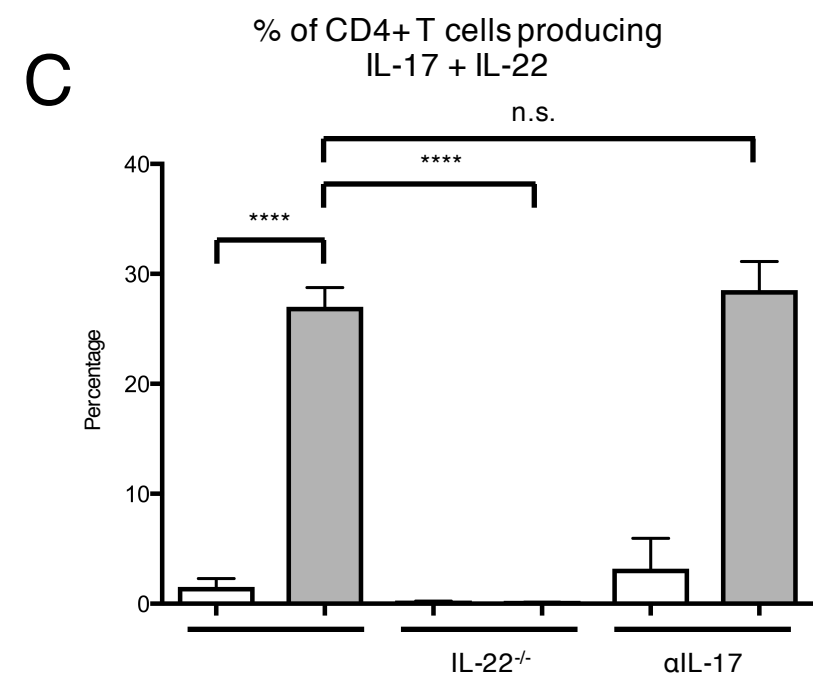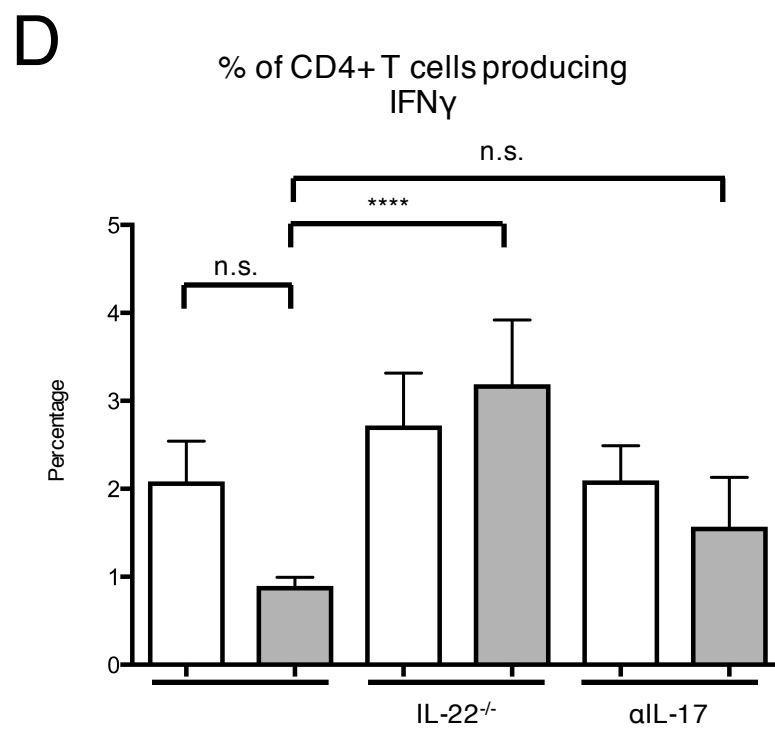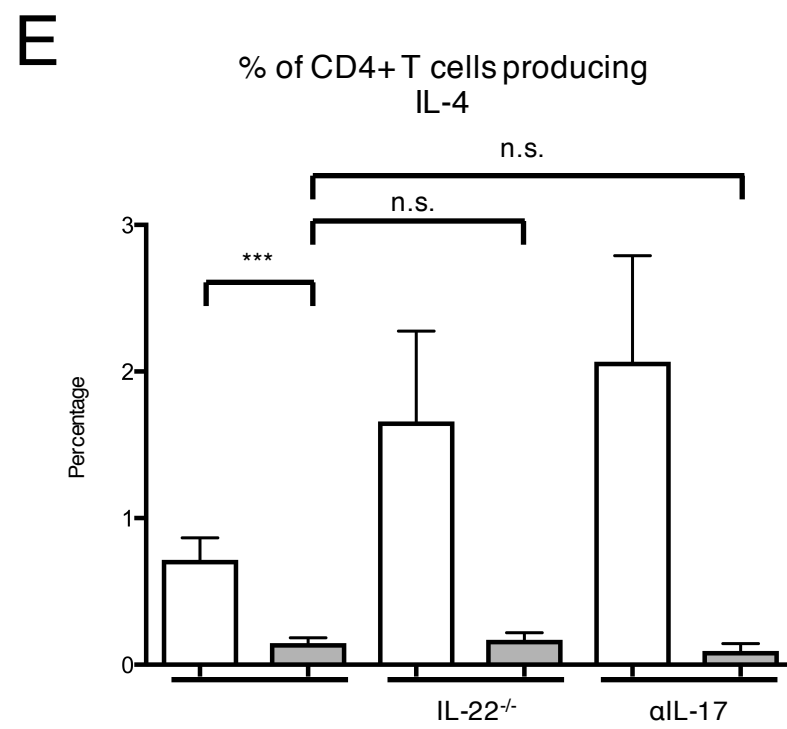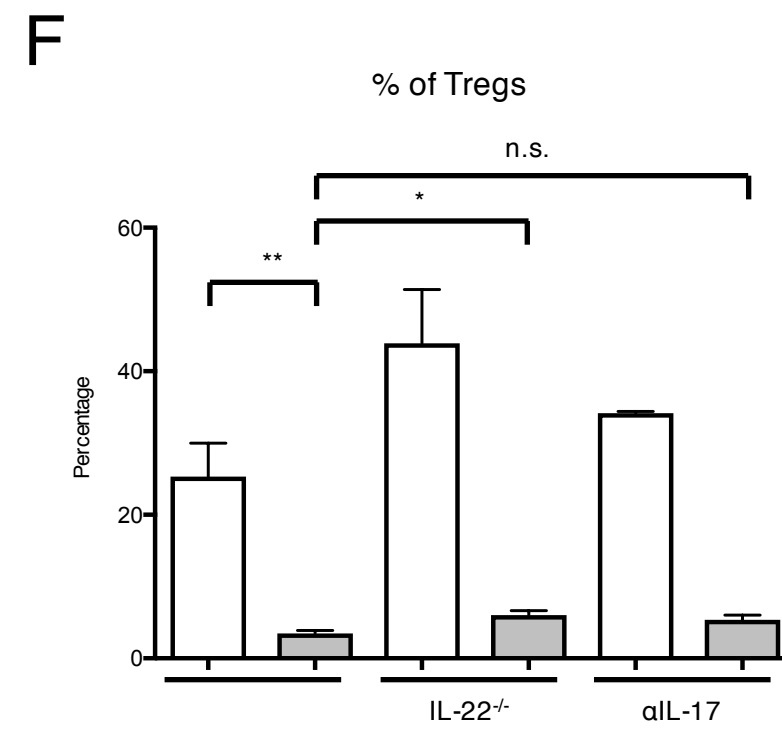

□ Control  
 ■ R26STAT3C<sup>stopfl/fl</sup> CD4Cre

**A**% of T cells producing IFN- $\gamma$ 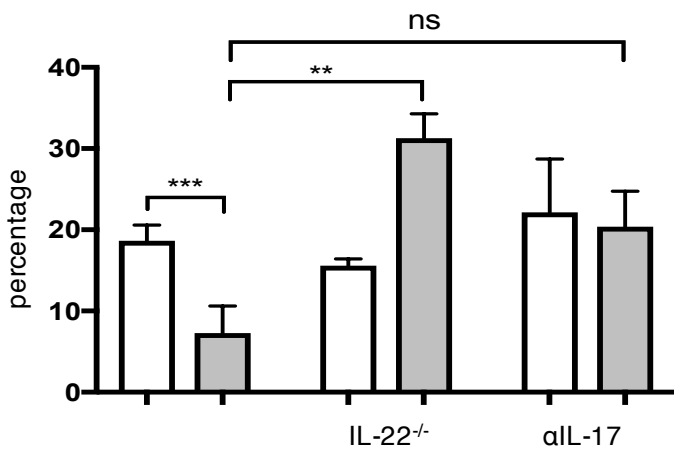**B**

% of T cells producing IL-4

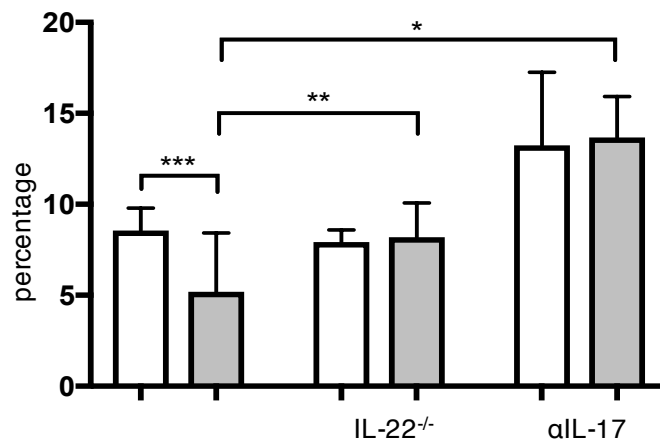**C**

% of Tregs in bone marrow

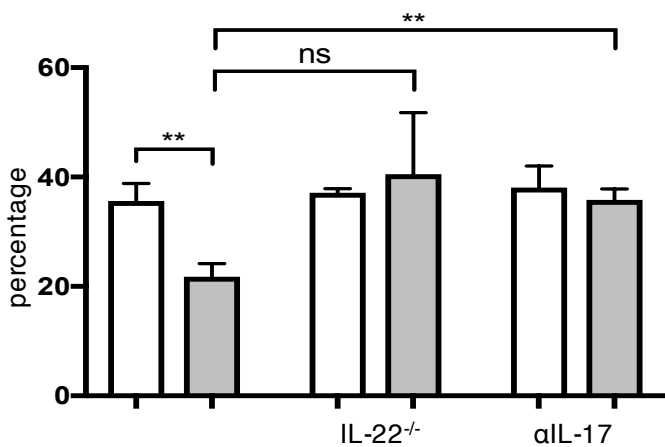

□ Control    ■ R26STAT3C<sup>stopfl/fl</sup> CD4Cre
